# Supplementary material
Source: Springer Nature journal article supplement (https://www.springermedizin.de/resource/supplementary/12913_2010_1660_MOESM5_ESM.pdf/9528638)

**Total costs in EUR**

1,400,000,000

1,200,000,000

1,000,000,000

800,000,000

600,000,000

400,000,000

200,000,000

0

25%

30%

40%

50%

60%

70%

80%

■ Non-KEPH

■ KEPH

**Coverage (effective demand) for KEPH and non KEPH services in 2006/07**

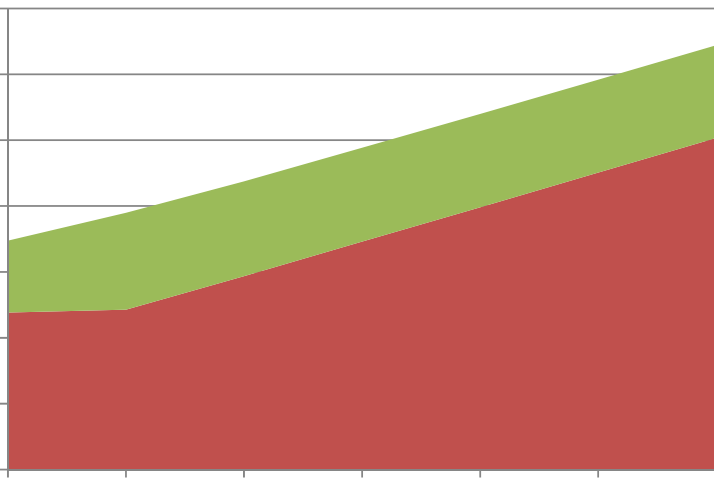

Supplement: MOESM5 [file 9528638]
